# Supplementary material for: A practical approach for enhanced biodiesel production using organic modified montmorillonites as efficient heterogeneous hybrid catalysts
Source: Royal Society of Chemistry journal article supplement (doi:10.1039/d4gc01084a), 2024-01-01
Supplement: d4gc01084a1.pdf [file d4gc01084a1.pdf]

## Supplementary Information

### **A practical approach for enhanced biodiesel production using organic modified montmorillonites as efficient heterogeneous hybrid catalysts**

Lijuan He<sup>a</sup>, Long Chen<sup>a</sup>, Yingxia Nie<sup>a</sup>, Minglu He<sup>b</sup>, Guixiang Wu<sup>b</sup>, Yan Li<sup>b</sup>, Hanjing Tian<sup>c\*</sup>, Heng Zhang<sup>a\*</sup>

<sup>a</sup>National Key Laboratory of Green Pesticide, State-Local Joint Laboratory for Comprehensive Utilization of Biomass, Center for Research & Development of Fine Chemicals, Guizhou University, Guiyang, Guizhou 550025, China

<sup>b</sup>School of Chemistry and Chemical Engineering, Guizhou University, Guiyang 550025, Guizhou, China

<sup>c</sup>School of Materials and Architectural Engineering, Guizhou Normal University, Guiyang, Guizhou 550025, China

\* Correspondence should be addressed to Heng Zhang: [h Zhang23@gzu.edu.cn](mailto:h Zhang23@gzu.edu.cn); [tianhj@gznu.edu.cn](mailto:tianhj@gznu.edu.cn).

## Characterization of catalyst

X-ray diffraction (XRD) was utilized to identify the crystal textures of the samples, and the instrument model was Bruker D8 Advance, using Cu  $k\alpha$  radiation with  $\lambda = 0.15$  nm and  $2\theta$  range from  $5^\circ$  to  $90^\circ$ . Fourier transform infrared (FT-IR) spectra of the catalysts were measured by NICOLET iS50 with tested ranging was  $4000\text{-}400\text{ cm}^{-1}$ , and spectral information was recorded by KBr and carbon catalytic mixed tablet pressing method. X-ray photoelectron spectroscopy (XPS) was conducted on a Thermo Scientific™ K-Alpha™+ spectrometer equipped with a monochromatic Al  $K\alpha$  X-ray source ( $1486.68\text{ eV}$ ) operating at  $100\text{ W}$ . Samples were analysed under vacuum ( $P < 10^{-8}\text{ mbar}$ ) with a pass energy of  $150\text{ eV}$  (survey scans) or  $50\text{ eV}$  (high-resolution scans). All peaks would be calibrated with C1s peak binding energy at  $284.60\text{ eV}$  for adventitious carbon. Thermogravimetric analysis was conducted on (Netzsch TG 209F1, Germany), and the system was programmed to heat up from room temperature to  $800^\circ\text{C}$  at  $10^\circ\text{C}/\text{min}$  under nitrogen gas at  $50\text{ mL}/\text{min}$  with a constant flow rate. Scanning electron microscope (SEM) characterization was conducted on an electron microscope (Quanta FEG 250). TEM (transmission electron microscope), STEM-HAADF (high-angle annular dark-field scanning transmission electron microscopy) images, and corresponding element mapping were obtained utilizing a JEM-2100F instrument.

$\text{N}_2$ -physical adsorption-desorption characterization, the specific surface area, and pore size of the sample were detected by Micromeritics ASAP 2460 chemisorbent instrument. The samples were vacuumed at  $120^\circ\text{C}$  for  $5\text{ h}$  and tested at the temperature of liquid nitrogen ( $-196^\circ\text{C}$ ), the specific surface area was BET, and the pore size distribution was calculated by the BJH formula. Ammonia temperature-programmed desorption ( $\text{NH}_3$ -TPD) was analyzed with the AutoChem 2920 apparatus. By the pretreatment method of keeping at  $120^\circ\text{C}$  for  $5\text{ h}$  under He gas purging atmosphere and then cooling to room temperature,  $\text{NH}_3$  was quantitatively adsorbed on the sample as the probe molecule, and then the adsorbed  $\text{NH}_3$  was desorbed with He gas as the desorption medium under the continuous heating condition of  $50\text{-}500^\circ\text{C}$ .

### Biodiesel yield calculation method

Biodiesel yield was determined using gas chromatography (GC, Agilent 7890 B), and the specific GC analysis information was expressed as follows: inlet temperature = 523 K, detector temperature = 523 K, split ratio = 20:1, oven temperature programmed = 453 K, ramp rate of 15 K min<sup>-1</sup> to 513 K and maintained for 8 min at 513 K, injection volume = 1 μL, flow rate of nitrogen carrier gas = 45 mL/min; flow rate of air = 450 mL/min; and flow rate hydrogen = 40 mL/min.

Heptadecanoic acid methyl ester (C17:0) was utilized as an internal standard, and the mass of FAMES formed and yield of biodiesel were calculated according following formal:

$$\text{Weight of FAMES in product} = \frac{(\sum A) - A_{C17:0}}{A_{C17:0}} \times m_{C17:0}$$

$$\text{Biodiesel yield} = \frac{\text{Weight of FAMES in product}}{\text{Weight of feedstock taken}}$$

Wherein,  $\sum A$  denotes the total peak areas of FAMES.  $A_{C17:0}$  and  $m_{C17:0}$  represent the peak and mass of internal standard respectively.

## **Table and Figure Captions:**

**Table S1.** Textural, acid properties and corresponding biodiesel yield of different catalysts.

**Table S2.** The design matrix includes experimental variables (A-D) and biodiesel yield.

**Table S3.** Properties of biodiesel produced from *Jatropha curcas* L. oil.

**Fig. S1.** The typical GC graph of biodiesel sample.

**Fig. S2.** The relative parity of the biodiesel yield and predicted value.

**Fig. S3.** The relationship between reaction time and biodiesel yield at different temperatures using (a) ILs-OMt-0.6, (b) Amberlyst-15, (c) Mt.

**Fig. S4.** Computational energy diagrams for esterification reaction of FFAs with methanol via  $H^+$  and no catalyst pathway.

**Fig. S5.** (a) XRD patterns, (b) BET curves, (c) FT-IR, and (d) XPS spectrum of ILs-OMt-0.6 before and after reuse.

**Table S1.** Textural, acid properties and corresponding biodiesel yield of different catalysts.

| Entry | Catalyst    | $S_{\text{BET}}$ ( $\text{m}^2/\text{g}$ ) | $V_{\text{pore}}$ ( $\text{cm}^3/\text{g}$ ) | $D_{\text{mean}}$ (nm) | Strong acid site | Weak/moderate      | Total acid site | Biodiesel |
|-------|-------------|--------------------------------------------|----------------------------------------------|------------------------|------------------|--------------------|-----------------|-----------|
|       |             |                                            |                                              |                        | (mmol/g)         | acid site (mmol/g) | (mmol/g)        | yield (%) |
| 1     | Mt          | 118.39                                     | 0.17                                         | 9.24                   | 0.32             | 0.23               | 0.55            | 17.26%    |
| 2     | OMt-0.6     | 98.85                                      | 0.16                                         | 9.54                   | 0.35             | 0.30               | 0.65            | 20.03%    |
| 3     | ILs-OMt-0.4 | 86.54                                      | 0.14                                         | 10.69                  | 0.60             | 0.64               | 1.25            | 86.25%    |
| 4     | ILs-OMt-0.6 | 80.41                                      | 0.13                                         | 12.28                  | 0.83             | 0.81               | 1.63            | 96.45%    |
| 5     | ILs-OMt-0.8 | 77.36                                      | 0.12                                         | 12.21                  | 0.85             | 0.94               | 1.78            | 93.61%    |

Reaction conditions: reaction temperature=80 °C, reaction time=6 h, catalyst dosage=6 wt%, molar ratio of methanol/OA=15:1.

**Table S2.** The design matrix includes experimental variables (A-D) and biodiesel yield.

| Run | CD (A) /wt.% | T (B) /°C | t (C) /h | M/OA (D) | Yield /% |
|-----|--------------|-----------|----------|----------|----------|
| 1   | 0.06         | 80        | 8        | 12       | 91.73    |
| 2   | 0.06         | 80        | 6        | 15       | 96.32    |
| 3   | 0.08         | 60        | 6        | 15       | 78.92    |
| 4   | 0.06         | 100       | 4        | 15       | 86.24    |
| 5   | 0.08         | 80        | 6        | 12       | 85.64    |
| 6   | 0.06         | 60        | 6        | 12       | 77.48    |
| 7   | 0.06         | 80        | 6        | 15       | 96.41    |
| 8   | 0.04         | 80        | 8        | 15       | 87.49    |
| 9   | 0.06         | 100       | 6        | 18       | 96.00    |
| 10  | 0.06         | 100       | 6        | 12       | 84.73    |
| 11  | 0.06         | 80        | 4        | 18       | 94.67    |
| 12  | 0.04         | 80        | 6        | 18       | 85.49    |
| 13  | 0.06         | 60        | 4        | 15       | 82.27    |
| 14  | 0.06         | 100       | 8        | 15       | 92.20    |
| 15  | 0.04         | 80        | 4        | 15       | 90.79    |
| 16  | 0.08         | 100       | 6        | 15       | 88.40    |
| 17  | 0.06         | 60        | 8        | 15       | 82.49    |
| 18  | 0.08         | 80        | 4        | 15       | 89.67    |
| 19  | 0.08         | 80        | 8        | 15       | 93.50    |
| 20  | 0.06         | 80        | 6        | 15       | 96.37    |
| 21  | 0.08         | 80        | 6        | 18       | 94.06    |
| 22  | 0.06         | 80        | 8        | 18       | 95.10    |
| 23  | 0.06         | 80        | 6        | 15       | 96.39    |
| 24  | 0.06         | 60        | 6        | 18       | 78.13    |
| 25  | 0.04         | 100       | 6        | 15       | 86.46    |
| 26  | 0.06         | 80        | 6        | 15       | 96.43    |
| 27  | 0.04         | 60        | 6        | 15       | 73.07    |
| 28  | 0.06         | 80        | 4        | 12       | 85.13    |
| 29  | 0.04         | 80        | 6        | 12       | 86.09    |

T-reaction temperature, t-reaction time, CD-catalyst dosage, M/OA-methanol/oleic acid molar ratio.

**Table S3.** Properties of biodiesel produced from *Jatropha curcas* L. oil.

| Properties                                         | ASTM D6751 | EN 14214  | Prepared<br><i>Jatropha curcas</i> L. biodiesel |
|----------------------------------------------------|------------|-----------|-------------------------------------------------|
| Flash point (°C)                                   | 93 min     | 120 min   | 147                                             |
| Acid value (mg KOH/g)                              | 0.50 max   | 0.50 max  | 0.17                                            |
| Density (20.00 °C, kg·m <sup>-3</sup> )            | -          | 860-900   | 879.98                                          |
| Cetane number                                      | 47 min     | 51 min    | 55.53                                           |
| Water content (mg/kg)                              | -          | 500 max   | traces                                          |
| Oxidative stability (110.00 °C, h)                 | 3 min      | 6 min     | 8                                               |
| Kinematic viscosity (mm <sup>2</sup> /s, 40.00 °C) | 1.90-6.00  | 3.50-5.00 | 4.27                                            |
| Free glycerin (%)                                  | 0.02 max   | 0.02 max  | 0.02                                            |
| Total glycerin (%)                                 | 0.24 max   | 0.25 max  | 0.15                                            |

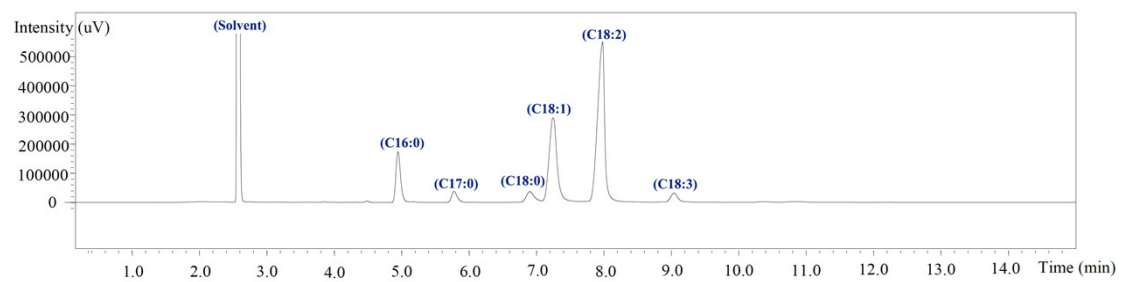

**Fig. S1.** The typical GC graph of biodiesel sample.



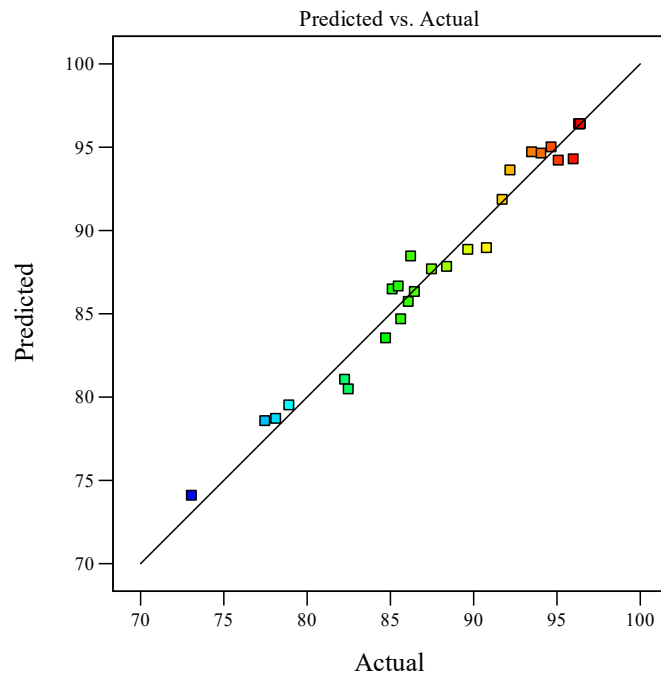

**Fig. S2.** The relative parity of the biodiesel yield and predicted value.

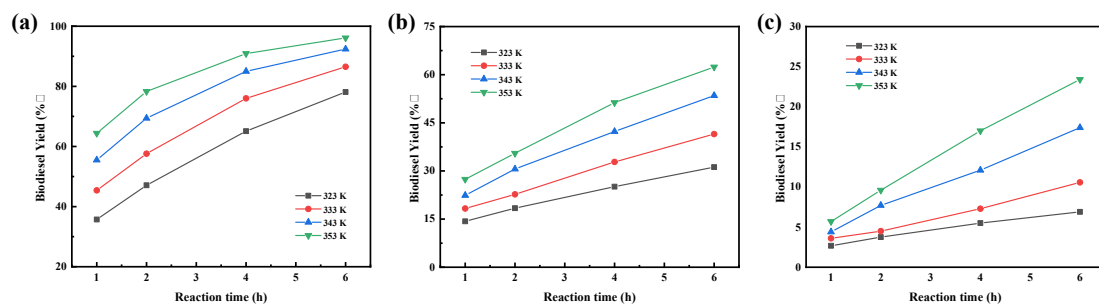

**Fig. S3.** The relationship between reaction time and biodiesel yield at different temperatures using (a) ILs-OMt-0.6, (b) Amberlyst-15, (c) Mt.

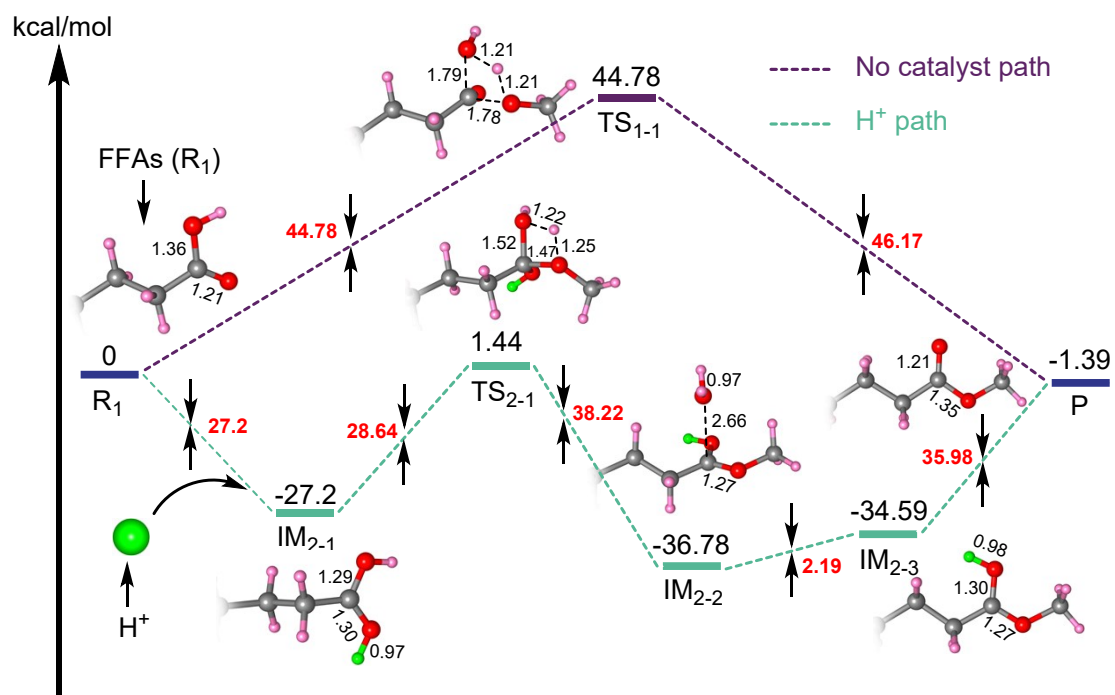

**Fig. S4.** Computational energy diagrams for esterification reaction of FFAs with methanol via H<sup>+</sup> and no catalyst pathway.

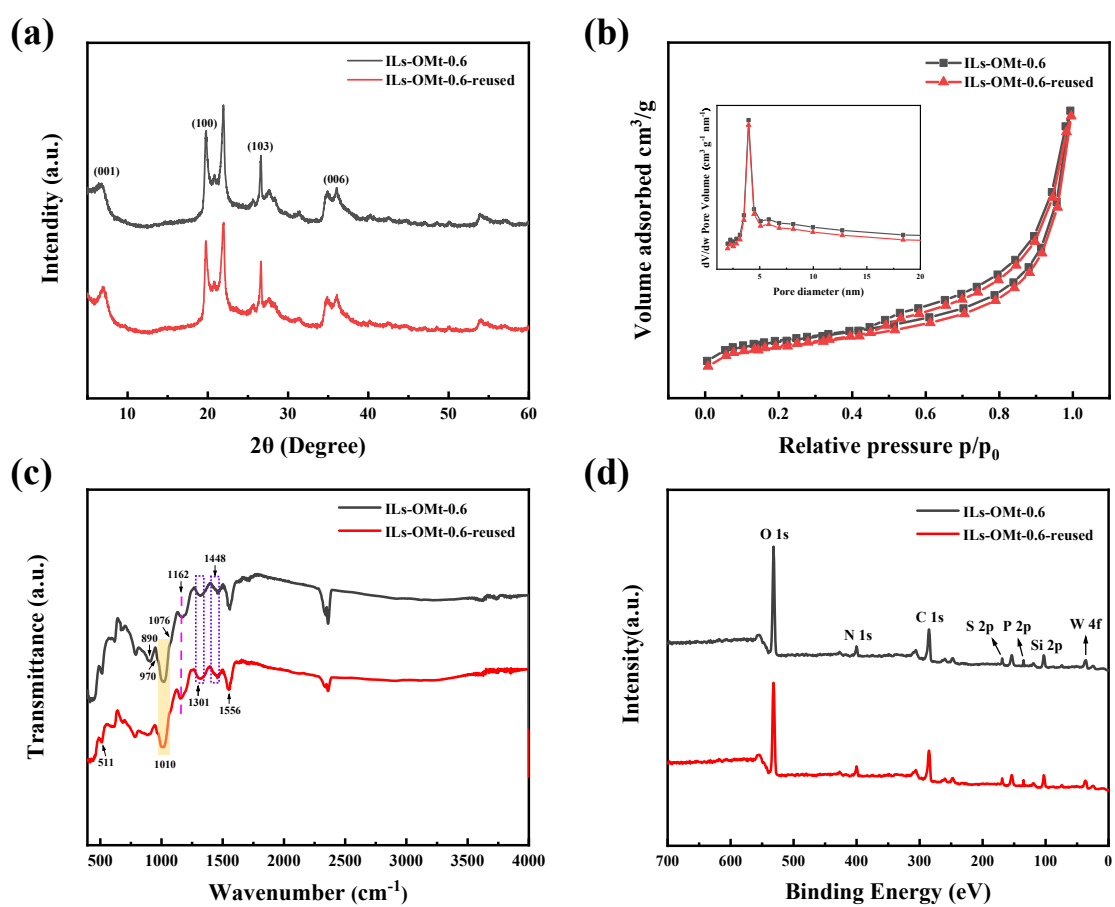

**Fig. S5.** (a) XRD patterns, (b) BET curves, (c) FT-IR, and (d) XPS spectrum of ILs-OMt-0.6 before and after reuse.
